# Supplementary material
Source: HighWire-hosted journal article supplement (https://gut.bmj.com/content/72/5/855)
Supplement: inline-supplementary-material-1 [file inline-supplementary-material-1.pdf]

|                  |          |
|------------------|----------|
| Version          | 1.0      |
| Development date | 20210810 |

Case Report Form

Patient ID:

Patient Name:

Research unit: The First Affiliated Hospital of  
the Naval Medical University

Enrollment Date:

Facilitators:

## Inclusion and exclusion criteria

### Inclusion criteria (To be enrolled, all of the following requirements must be met)

1. Community resident over 1 year old (Except for those with contraindications)

☐Yes ☐No

2. Multi-person family

(Definition of multi-person family: living together for more than 10 consecutive months per year)

☐Yes ☐No

### Exclusion criteria (Subjects are not eligible for enrollment if they meet any of the following criteria)

1. Used antibiotics within the past month, proton pump inhibitors within two weeks.

☐Yes ☐No

2. Fasting time less than 2 hours before the  $^{13}\text{C}$ -UBT test.

☐Yes ☐No

3. *H. pylori* treatment within the past three months

☐Yes ☐No

4. Severe cardiac, hepatic, or renal insufficiency

☐Yes ☐No

5. Contraindications to performing  $^{13}\text{C}$ -UBT

☐Yes ☐No

**Physician Signature:** \_\_\_\_\_ **Date:** \_\_\_\_\_

Questionnaire

|                  |                                                                                                                                                                                                                              |                        |          |                  |      |             |  |
|------------------|------------------------------------------------------------------------------------------------------------------------------------------------------------------------------------------------------------------------------|------------------------|----------|------------------|------|-------------|--|
| Family ID        |                                                                                                                                                                                                                              | Name of household head |          | Telephone number |      | Family size |  |
| Family structure | 1.Head of household; 2.Husband; 3.Wife; 4.Children; 5.Father; 6.Mother; 7.Brothers and sisters; 8.Daughter in law/son-in-law; 9.Grandfather; 10.Grandmother; 11.Grandchildren; 12.Granddaughter in law/son-in-law; 13.Others |                        |          |                  |      |             |  |
| Address          | Province                                                                                                                                                                                                                     | City                   | District | Street           | Road |             |  |

Question for the family

|                                                                                |                                                                                                                                  |  |
|--------------------------------------------------------------------------------|----------------------------------------------------------------------------------------------------------------------------------|--|
| 1、Family economy and living conditions                                         |                                                                                                                                  |  |
| 1.1                                                                            | Annual family income (RMB): 1.<100,000; 2.100,000-300,000; 3.>300,000                                                            |  |
| 1.2                                                                            | Living area: 1. City; 2. Rural                                                                                                   |  |
| 1.3                                                                            | Total living area (m²): 1.<60; 2.60-120; 3.>120                                                                                  |  |
| 1.4                                                                            | Do you keep animals at home? 1.No; 2.Yes                                                                                         |  |
| 1.4.1                                                                          | If yes, what animal is it? 1. Pets; 2. Poultry; 3. Livestock                                                                     |  |
| 2、Family hygienic and living habits                                            |                                                                                                                                  |  |
| 2.1                                                                            | Source of drinking water: 1. Boiled water; 2. Tap water; 3. Bottled water; 4. Well water; 5. Purified water                      |  |
| 2.2                                                                            | Cleaning of household dishes and chopsticks: 1. Wash with tap water; 2. In a basin                                               |  |
| 2.3                                                                            | Disinfection of household dishes and chopsticks: 1. Without disinfection; 2. Disinfection cabinet; 3. Other disinfection methods |  |
| 2.4                                                                            | Do you share the following items in your family? 1. Dishes and chopsticks; 2. Cups; 3. Mouthwash cups; 4. Dental appliances      |  |
| 2.5                                                                            | Is individual dining adopted in the family? 1.Yes 2. No                                                                          |  |
| 2.6                                                                            | Is serving chopsticks and spoons adopted for family meals? 1.Yes 2. No                                                           |  |
| 3、Family disease history (including deceased members within three generations) |                                                                                                                                  |  |
| 3.1                                                                            | Do you have any of the following diseases? 1. Gastric ulcer; 2. Gastric cancer; 3. No                                            |  |

Survey based on family members

(each member fills in the following questions)

|                                         |
|-----------------------------------------|
| 4、General information of family members |
|-----------------------------------------|

|                                                                                                       |                                                                                                                                                 |        |  |                |                           |                |  |
|-------------------------------------------------------------------------------------------------------|-------------------------------------------------------------------------------------------------------------------------------------------------|--------|--|----------------|---------------------------|----------------|--|
| Family ID                                                                                             |                                                                                                                                                 | Name   |  | Contact number |                           | ID card number |  |
| Gender                                                                                                | 1. Male;<br>2. Female                                                                                                                           | Nation |  | Date of birth  | □□□□ Year □□ Month □□ Day |                |  |
| 4.1                                                                                                   | Time of living together in the family: 1.<5 year; 2. ≥ 5 year; 3. ≥ 15 years; 4. ≥ 30 years                                                     |        |  |                |                           |                |  |
| 4.2                                                                                                   | Marital status: 1 Single; 2 Married; 3. Other                                                                                                   |        |  |                |                           |                |  |
| 4.3                                                                                                   | Education level: 1. Middle/High School; 2. College and above                                                                                    |        |  |                |                           |                |  |
| 4.4                                                                                                   | Occupation: 1. Worker; 2. Farmer; 3. Teacher; 4. Investigator; 5. Doctor; 6. Students; 7. Soldier; 9. Merchant; 10. Others                      |        |  |                |                           |                |  |
| <b>5、Personal hygiene and living habits</b>                                                           |                                                                                                                                                 |        |  |                |                           |                |  |
| 5.1                                                                                                   | Do you drink tap water (More than two times a week)? 1.No 2.Yes                                                                                 |        |  |                |                           |                |  |
| 5.2                                                                                                   | Do you wash your hands before meals and after defecation? 1.No 2.Yes                                                                            |        |  |                |                           |                |  |
| 5.3                                                                                                   | Dining out frequency: 1. Rare; 2. More than two days a week                                                                                     |        |  |                |                           |                |  |
| 5.3.1                                                                                                 | If "2" is selected, fill in the dining place: 1. Cafeteria dining; 2. Dining at road side restaurant; 3. Dining at hotel restaurant             |        |  |                |                           |                |  |
| <b>6、Past medical history</b>                                                                         |                                                                                                                                                 |        |  |                |                           |                |  |
| 6.1                                                                                                   | Do you have gastrointestinal discomfort in the past 1 year? 1.No 2.Yes                                                                          |        |  |                |                           |                |  |
| 6.2                                                                                                   | Have you had gastroscopy within 5 years? 1.No 2.Yes                                                                                             |        |  |                |                           |                |  |
| 6.3                                                                                                   | Have you ever tested Helicobacter pylori infection? 1.No 2.Yes                                                                                  |        |  |                |                           |                |  |
| 6.3.1                                                                                                 | If "yes", the results are: 1. Positive; 2. Negative                                                                                             |        |  |                |                           |                |  |
| 6.4                                                                                                   | Have you used the following drugs in the past 1 month? 1. No; 2. Antibiotics; 3. PPI; 4. Bismuth; 5. Antimicrobial traditional Chinese medicine |        |  |                |                           |                |  |
| 6.5                                                                                                   | Do you have a history of gastroduodenal surgery? 1.No 2.Yes                                                                                     |        |  |                |                           |                |  |
| <b>7、Hp test results</b>                                                                              |                                                                                                                                                 |        |  |                |                           |                |  |
| 7.1                                                                                                   | Results: 1. Positive 2. Negative                                                                                                                |        |  |                |                           |                |  |
| <b>8、Families with children and adolescents aged 1-18 continue to fill in the following questions</b> |                                                                                                                                                 |        |  |                |                           |                |  |
| 8.1                                                                                                   | Number of children in the family: 1.1; 2.2; 3.3-4; 5.5 or more                                                                                  |        |  |                |                           |                |  |
| 8.2                                                                                                   | Do parents have the habit of mouth-to-mouth feeding? 1.No 2.Yes                                                                                 |        |  |                |                           |                |  |
| 8.3                                                                                                   | Do children have the habit of holding toys in mouth? 1.No 2.Yes                                                                                 |        |  |                |                           |                |  |
| 8.4                                                                                                   | Do parents often kiss their children mouth to mouth? 1.No 2.Yes                                                                                 |        |  |                |                           |                |  |

|     |                                                                                                                          |  |
|-----|--------------------------------------------------------------------------------------------------------------------------|--|
| 8.5 | Kindergarten age: 1. Never; 2. <3 years old; 3. Aged 3-5; 4.>5 years old                                                 |  |
| 8.6 | Who is the primary caretaker of the child? 1. Mother 2. Grandmother 3. Grandfather<br>4. Father 5. Housekeeper 6. Others |  |

Investigator (signature):

Date of investigation:  Year  Month  Day

**Investigator Statement:**

All clinical data have been truthfully, accurately and completely documented in the  
  
CRF.

**Physician signature:** \_\_\_\_\_

**Date:** \_\_\_\_\_

**I have reviewed the above content and confirmed the accuracy.**

**Signature of the head director:** \_\_\_\_\_ **Date:** \_\_\_\_\_

|      |          |
|------|----------|
| 版本号  | 1.0      |
| 制定日期 | 20210810 |

病例报告表

(Case Report Form)

患者编号：

患者姓名：

研究单位：海军军医大学第一附属医院消化内科

研究入组时间：      年    月    日

操作医师：

负责医师：

申办单位：海军军医大学第一附属医院消化内科

## 入选、排除标准

### 入选标准（受试者必须满足以下所有要求，方可入选）

1 岁以上的社区人群（有禁忌证者除外）。

☐是 ☐否

2 非独居家庭

（非独居家庭定义为：家庭成员每年至少连续十个月共同居住）

☐是 ☐否

### 排除标准（受试者如果符合以下任意一项要求，即不可入选）

1. 一个月内服用过抗生素、铋剂、有抗菌作用的中药或两周内服用过质子泵抑制剂 (proton pump inhibitor, PPI)、H<sub>2</sub> 受体拮抗剂等药物。

☐是 ☐否

2. 检测前空腹时间小于 2 h。

☐是 ☐否

3. 近三个月内接受过 HP 根除治疗

☐是 ☐否

4. 有严重心、肝、肾功能不全，严重神经病变或精神疾病者；

☐是 ☐否

5. 研究者认为不适合参加本项目的受检者

☐是 ☐否

注：入选标准均回答“是”，排除标准均回答“否”方能入选。

医师签名：\_\_\_\_\_ 日期：\_\_\_\_\_



中国万个居民家庭 Hp 感染大数据调查表（一户一表）

|        |                                                                                |      |      |      |       |           |         |
|--------|--------------------------------------------------------------------------------|------|------|------|-------|-----------|---------|
| 家庭编号   |                                                                                | 户主姓名 |      | 联系电话 |       | 家庭中共同生活人数 |         |
| 家族成员结构 | 1 户主本人 2 夫 3 妻 4 儿女 5 父亲 6 母亲 7 兄弟姐妹 8 媳/婿 9（外）祖父 10（外）祖母 11 孙（女）12 孙媳/婿 13 其它 |      |      |      |       |           |         |
| 家庭地址   | 省 市(县)                                                                         |      | 区(乡) |      | 街道(村) |           | 路(小组) 号 |

家庭共性问题

|                      |                                                       |  |
|----------------------|-------------------------------------------------------|--|
| 1、家庭经济和居住状况          |                                                       |  |
| 1.1                  | 家庭年收入：1. <10 万 2. 10-30 万 3. >30 万                    |  |
| 1.2                  | 生活地区 1.城市 2. 城乡结合部/小城镇，城郊 3.农村                        |  |
| 1.3                  | 家庭居住总面积（建筑面积/平方米）：1. <60 2. 60-120 3. >120            |  |
| 1.4                  | 家庭养有动物吗？1. 无 2. 有                                     |  |
| 1.4.1                | 有，是什么动物？1. 宠物 2. 家禽 3. 家畜                             |  |
| 2、家庭卫生和生活习惯          |                                                       |  |
| 2.1                  | 家庭的饮用水主要来源于： 1. 自来水（加热）2. 自来水（生水） 3. 瓶装水 4. 井水 5. 纯净水 |  |
| 2.2                  | 家庭碗筷刷洗情况如何： 1. 流水洗 2. 静水/盆洗洗                          |  |
| 2.3                  | 家庭碗筷消毒情况如何： 1. 无消毒 2. 自动消毒柜 3. 其他消毒法                  |  |
| 2.4                  | 家庭中是否有以下物品共用： 1. 碗筷 2. 茶杯 3. 漱口杯 4. 牙具                |  |
| 2.5                  | 家庭内聚餐是否采用分餐制？：1. 是 2. 否                               |  |
| 2.6                  | 家庭聚餐是否使用公筷、公勺？ 1. 是 2. 否                              |  |
| 3、家族疾病史（包括已故的三代内的成员） |                                                       |  |
| 3.1                  | 是否有下列疾病： 1. 胃溃疡 2. 胃癌 3. 无                            |  |

以家庭成员个体模块的调查（每一成员填写下列问题）

|             |                                                            |  |    |  |      |             |      |  |
|-------------|------------------------------------------------------------|--|----|--|------|-------------|------|--|
| 4、家庭成员一般情况  |                                                            |  |    |  |      |             |      |  |
| 家庭内编号       |                                                            |  | 姓名 |  | 联系电话 |             | 身份证号 |  |
| 性别          | 1. 男 2. 女                                                  |  | 民族 |  | 出生日期 | □□□□年□□月□□日 |      |  |
| 4.1         | 在本家庭共同生活的时间：1. <5 年 2. ≥5 年 3. ≥15 年 4. ≥30 年              |  |    |  |      |             |      |  |
| 4.2         | 婚姻状况：1 未婚 2 已婚 3. 其它                                       |  |    |  |      |             |      |  |
| 4.3         | 文化程度：1. 初中及高中 2. 大专/大学及以上                                  |  |    |  |      |             |      |  |
| 4.4         | 职业：1 工人 2 农民 3 教师 4 管理/科技人员 5 医务人员 6 学生 7. 军人；9. 个体，10. 其它 |  |    |  |      |             |      |  |
| 5、个人卫生和生活习惯 |                                                            |  |    |  |      |             |      |  |

|                       |                                                     |  |
|-----------------------|-----------------------------------------------------|--|
| 5.1                   | 是否喝生水(每周二天以上)? 1. 否 2. 是                            |  |
| 5.2                   | 饭前便后洗手吗? 1. 否 2. 是                                  |  |
| 5.3                   | 外出就餐频率: 1. 很少 2. 每周二天以上                             |  |
| 5.3.1                 | 选择2者填写在外进餐地点: 1. 学校/单位食堂 2. 小型餐馆 3. 大型饭店            |  |
| 6、既往病史                |                                                     |  |
| 6.1                   | 近1年内是否有胃肠道不适症状: 1. 无 2. 有                           |  |
| 6.2                   | 5年之内是否做过胃镜: 1. 否 2. 是                               |  |
| 6.3                   | 是否曾做过幽门螺杆菌感染的相关检查: 1. 否 2. 是                        |  |
| 6.3.1                 | 若做过, 结果如何: 1. 阳性 2. 阴性                              |  |
| 6.4                   | 近1月内是否用过以下药物: 1. 否 2. 抗生素 3. 抑酸剂 4. 铋剂 5. 抗菌作用的中药   |  |
| 6.5                   | 是否有胃十二指肠手术史 1. 否 2. 是                               |  |
| 7、本次调查检测Hp结果          |                                                     |  |
| 7.1                   | 结果: 1. 阳性 2. 阴性                                     |  |
| 8、有1-18岁儿童的家庭继续填写下列问题 |                                                     |  |
| 8.1                   | 儿童数: 1. 独生子女 2. 2个 3. 3-4个 5. 5个或以上                 |  |
| 8.2                   | 家长是否有将食物咀嚼或口对口喂食习惯: 1. 无 2. 有                       |  |
| 8.3                   | 儿童是否有将玩具或物品塞入口中的习惯: 1. 无 2. 有                       |  |
| 8.4                   | 家长经常口对口亲吻孩子吗: 1. 无 2. 有                             |  |
| 8.5                   | 进幼儿园情况: 1. 从未进过 2. 3岁以前进 3. 3-5岁进 4. >5岁进           |  |
| 8.6                   | 主要由谁照看: 1. 母亲 2. (外)祖母 3. (外)祖父 4. 父亲 5. 家政人员 6. 其他 |  |

调查员(签字):

调查日期: 年月日

研究者声明：

所有临床资料都已真实、准确并完整地记录在 CRF 中。

医师签名：\_\_\_\_\_

日 期：\_\_\_\_\_

以上内容已经我审核，确认无误。

中心负责人签字：\_\_\_\_\_ 日期：\_\_年\_\_月\_\_日
